# Supplementary material for: Poly(ε-caprolactones) Initiated by Chiral Compounds: A New Protocol to Support Organocatalysts
Source: MDPI journal article supplement (doi:10.3390/catal13010164), 2023-01-10
Supplement: s1 [file s1]

Archive with 1 entries (1 files):
- catalysts-2116971-supplementary.pdf
